# Supplementary material for: Phase Ib open-label, multicenter study of pixatimod, an activator of TLR9, in combination with nivolumab in subjects with microsatellite-stable metastatic colorectal cancer, metastatic pancreatic ductal adenocarcinoma and other solid tumors
Source: PubMed Central journal article supplement — J Immunother Cancer. 2023 Jan 12;11(1):e006136. doi: 10.1136/jitc-2022-006136 (PMC9843174; doi:10.1136/jitc-2022-006136), 2023-01-12
Supplement: jitc-2022-006136supp001.pdf [file jitc-2022-006136supp001.pdf]

## Graphical abstract

### Phase Ib open-label, multicenter study of pixatimod, an activator of TLR9, in combination with nivolumab in subjects with microsatellite-stable metastatic colorectal cancer, metastatic pancreatic ductal adenocarcinoma and other solid tumors

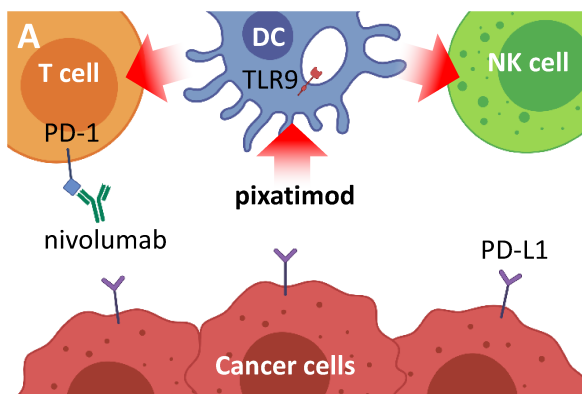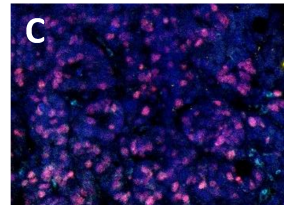

Tumor biopsies from PR patient outlined in red (B). Pre-treatment above, On-treatment below.

Present during treatment are higher numbers of CD8 and CD4 T cells.

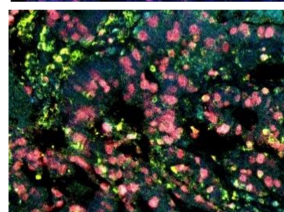

■ CD3    ■ Ki67  
■ CD4    ■ Nucleus  
■ CD8

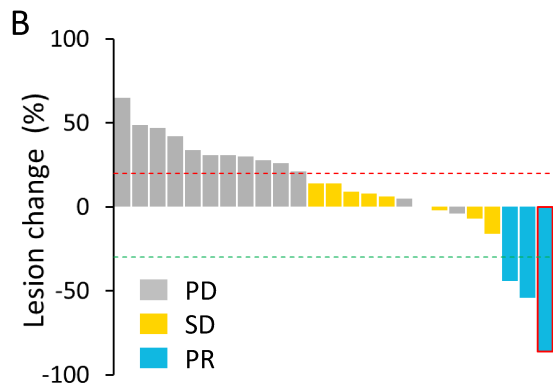

#### In Brief

- Pixatimod activates DC via TLR9 to engage T cells and NK cells. Cold tumors, such as MSS CRC, contain limited immune cells and are resistant to checkpoint inhibitor drugs such as nivolumab.
- This study evaluated pixatimod in combination with nivolumab and detected signs of clinical benefit for MSS CRC patients.
- It also found evidence of increased T cell tumor infiltration and biomarkers that correlate with clinical benefit.

#### Authors

Charlotte Lemech, Keith Dredge, Darryn Bampton, Edward Hammond, Andrew Clouston, Nigel J. Waterhouse, Amanda C. Stanley, Lucie Leveque-El Mouttie, Grace M. Chojnowski, Andrew Haydon, Nick Pavlakis, Matthew Burge, Michael P. Brown, David Goldstein
